# Supplementary material
Source: Springer Nature journal article supplement (http://www.springermedizin.de/resource/supplementary/13102_2012_8_MOESM1_ESM.pdf/9686396)

(a)

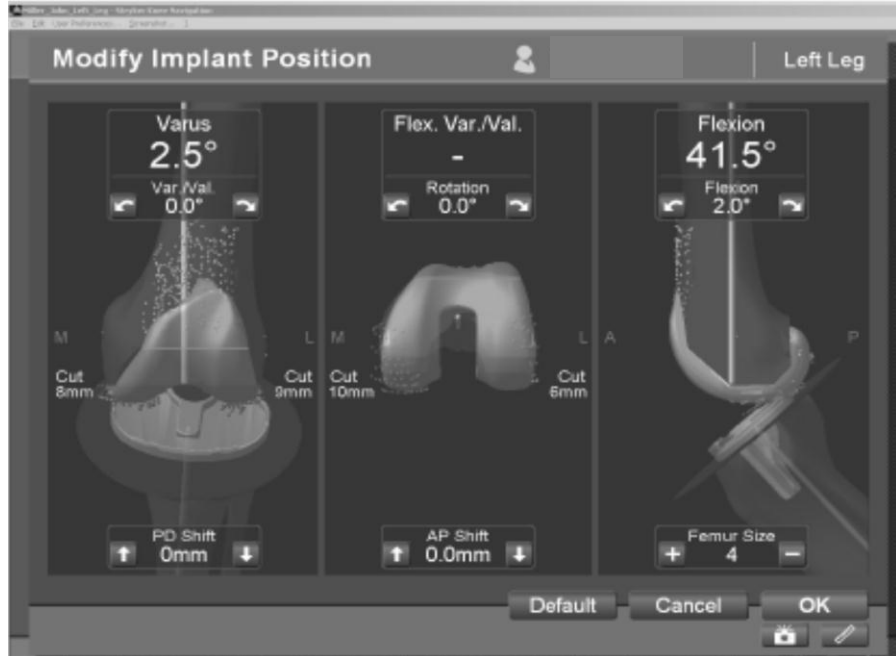

(b)

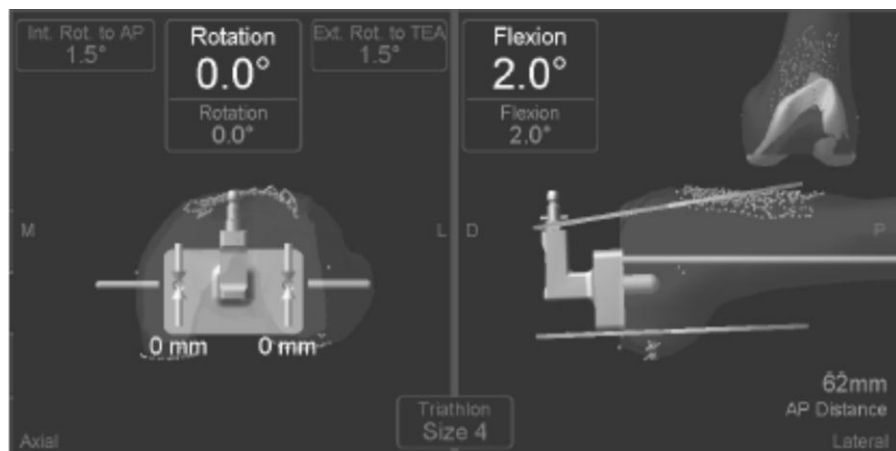

Supplement: MOESM1 [file 9686396]
